# Supplementary material
Source: MDPI journal article supplement (https://www.mdpi.com/2073-4352/12/10/1474)
Supplement: s1 [file s1]

# Supplementary Materials

## New Voltammetric Sensor Based on LDH and H<sub>2</sub>O<sub>2</sub> for L-Proline Determination in Red and White Wines

Mauro Tomassetti <sup>1,2,\*</sup>, Claudio Leonardi <sup>3</sup>, Riccardo Pezzilli <sup>3</sup>, Giuseppe Prestopino <sup>3</sup>, Corrado Di Natale <sup>1</sup> and Pier Gianni Medaglia <sup>3</sup>

<sup>1</sup> Department of Electronic Engineering, University of Rome "Tor Vergata", Via del Politecnico 1, 00133 Rome, Italy

<sup>2</sup> Department of Chemistry, University of Rome, "La Sapienza", P.le A. Moro 5, 00185 Rome, Italy

<sup>3</sup> Department of Industrial Engineering, University of Rome "Tor Vergata", Via del Politecnico 1, 00133 Rome, Italy

\* Correspondence: mauro.tomassetti@uniroma1.it

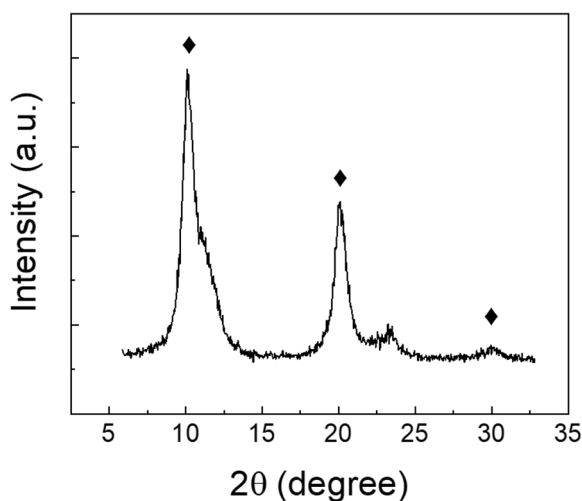

**Figure S1.** X-ray diffraction patterns of LDH obtained by the coprecipitation method. The main basal reflections of (Zn-Al-NO<sub>3</sub>) LDH phase are labelled by diamonds (♦).

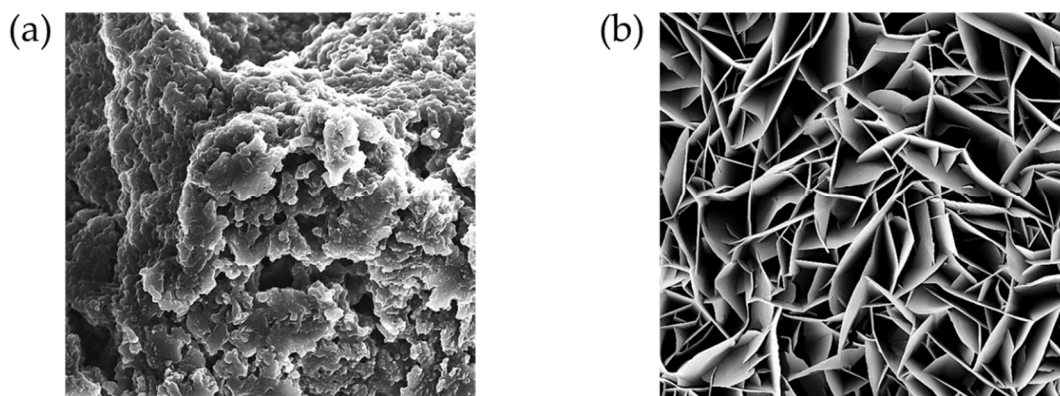

**Figure S2.** SEM images of (Zn-Al-NO<sub>3</sub>) LDH obtained by: (a) coprecipitation method; (b) grown in situ by hydrothermal method.
